# Supplementary material for: Polyethylenimine, an Autophagy-Inducing Platinum-Carbene-Based Drug Carrier with Potent Toxicity towards Glioblastoma Cancer Stem Cells
Source: MDPI journal article supplement (doi:10.3390/cancers14205057), 2022-10-15
Supplement: s1 [file s1]

# Supplementary information

## Polyethylenimine, an Autophagy-Inducing Platinum-Carbene-Based Drug Carrier with Potent Toxicity towards Glioblastoma Cancer Stem Cells

Conor McCartin <sup>1</sup>, Candice Dussouillez <sup>1</sup>, Chloé Bernhard <sup>2</sup>, Eric Mathieu <sup>3,4</sup>, Juliette Blumberger <sup>1</sup>,  
Monique Dontenwill <sup>2</sup>, Christel Herold-Mende <sup>5</sup>, Ahmed Idbaih <sup>6</sup>, Philippe Lavalley <sup>3,4</sup>,  
Stéphane Bellemin-Laponnaz <sup>7</sup>, Antoine Kichler <sup>1,\*</sup> and Sylvie Fournel <sup>1,\*</sup>

<sup>1</sup> 3Bio Team, CAMB UMR7199 CNRS, Faculté de Pharmacie, University of Strasbourg, 67401 Illkirch, France

<sup>2</sup> Laboratoire de Bioimagerie et Pathologies UMR CNRS 7021 (LBP), Faculté de Pharmacie, University of Strasbourg, 67401 Illkirch, France

<sup>3</sup> Institut National de la Santé et de la Recherche Médicale, Inserm UMR\_S 1121 Biomaterials and Bioengineering, 67085 Strasbourg, France

<sup>4</sup> Faculté de Chirurgie Dentaire de Strasbourg, University of Strasbourg, 67000 Strasbourg, France

<sup>5</sup> Division of Neurosurgical Research, Department of Neurosurgery, University of Heidelberg, 69117 Heidelberg, Germany

<sup>6</sup> AP-HP, Institut du Cerveau—Paris Brain Institute—ICM, Inserm, CNRS, Hôpitaux Universitaires La Pitié Salpêtrière—Charles Foix, DMU Neurosciences, Service de Neurologie 2-Mazarin, Sorbonne University, 75013 Paris, France

<sup>7</sup> Institut de Physique et Chimie des Matériaux de Strasbourg (IPCMS) UMR7504 CNRS, University of Strasbourg, 67034 Strasbourg, France

\* Correspondence: kichler@unistra.fr (A.K.); s.fournel@unistra.fr (S.F.)

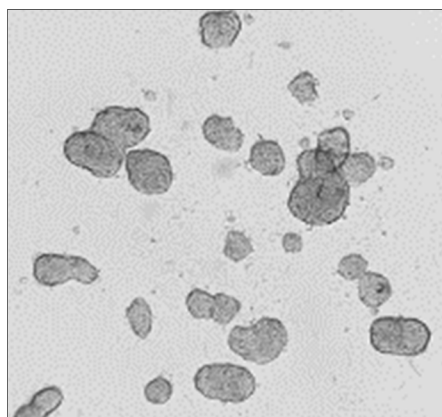

**Figure S1. DPSC spheroid cell culture.** Inverted light microscope image of DPSC spheroids grown in U-bottomed suspension 96 well culture dishes for 24 h before imaging at  $4\times 10\times = 400\times$  magnification using an Axio Vert A1 inverted light microscope (Zeiss) coupled to a ProgRes C5 cool (Jenoptik) camera.

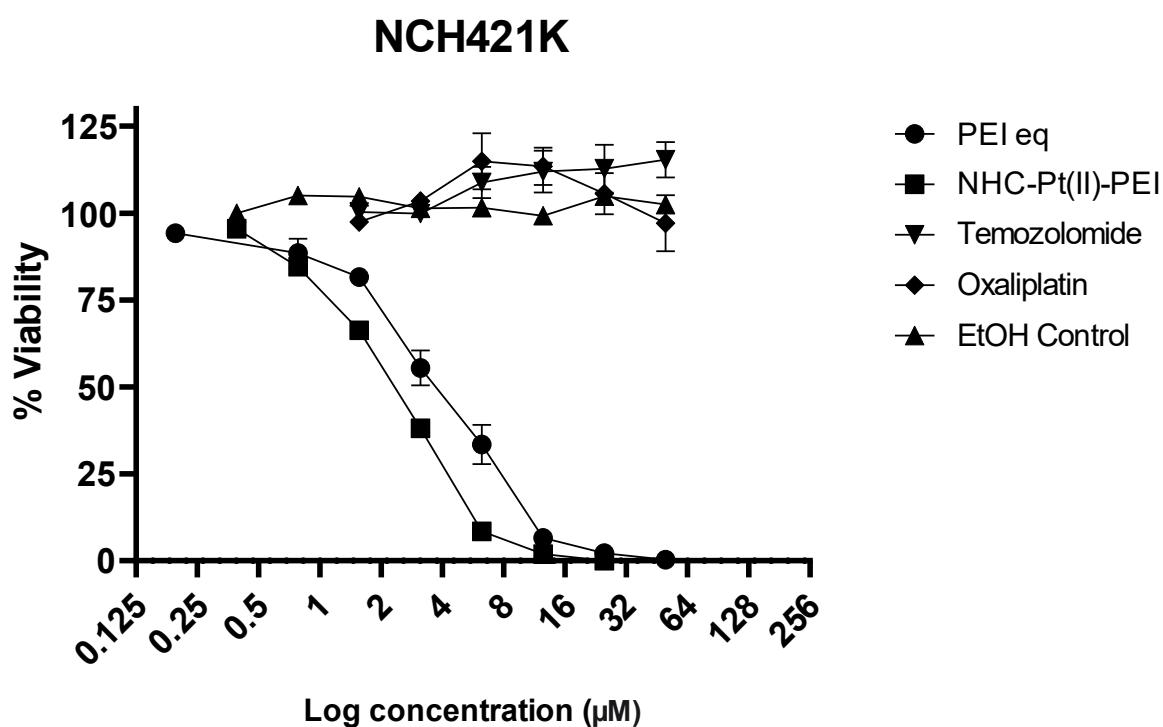

**Figure S2. IC<sub>50</sub> for the GSC cell line NCH421K.** CelltiterGlo 3D viability dose-response of 24 h treated NCH421K cells. Values represent the mean of at least  $n=3$  independent replicates. Error bars represent  $\pm$  one SEM.

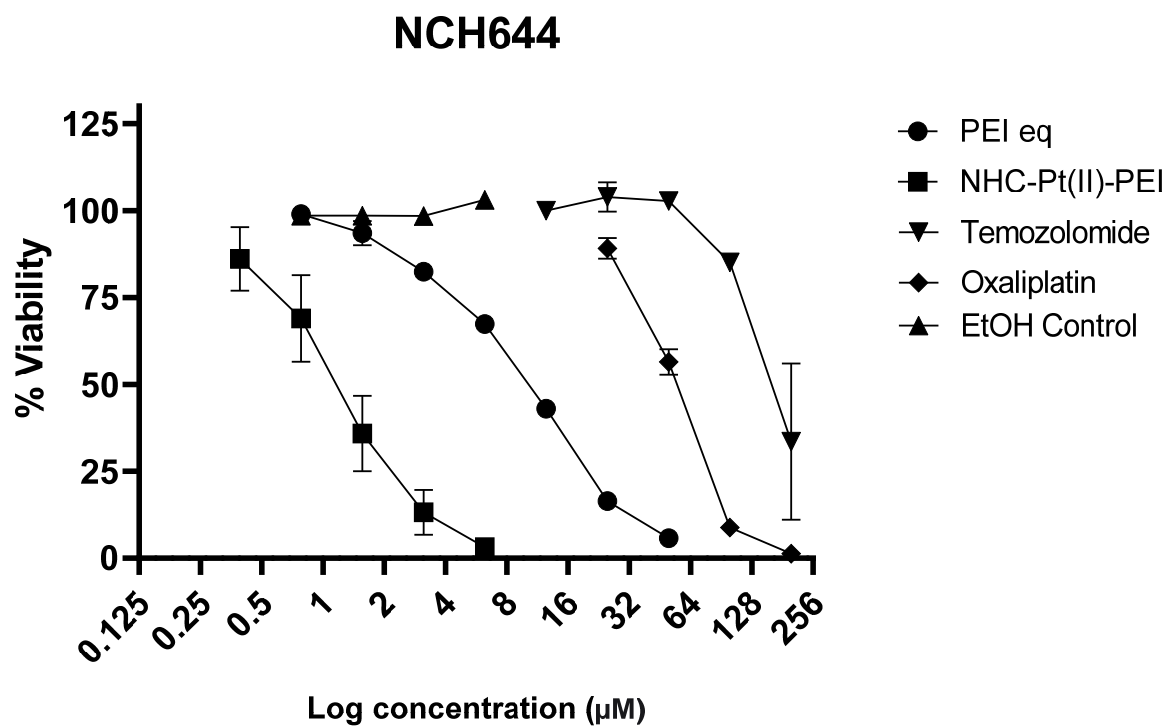

**Figure S3. IC<sub>50</sub> for the GSC cell line NCH644.** CelltiterGlo 3D viability dose-response of 24 h treated NCH644 cells. Values represent the mean of at least n=3 independent replicates. Error bars represent +/- one SEM.

### 3731

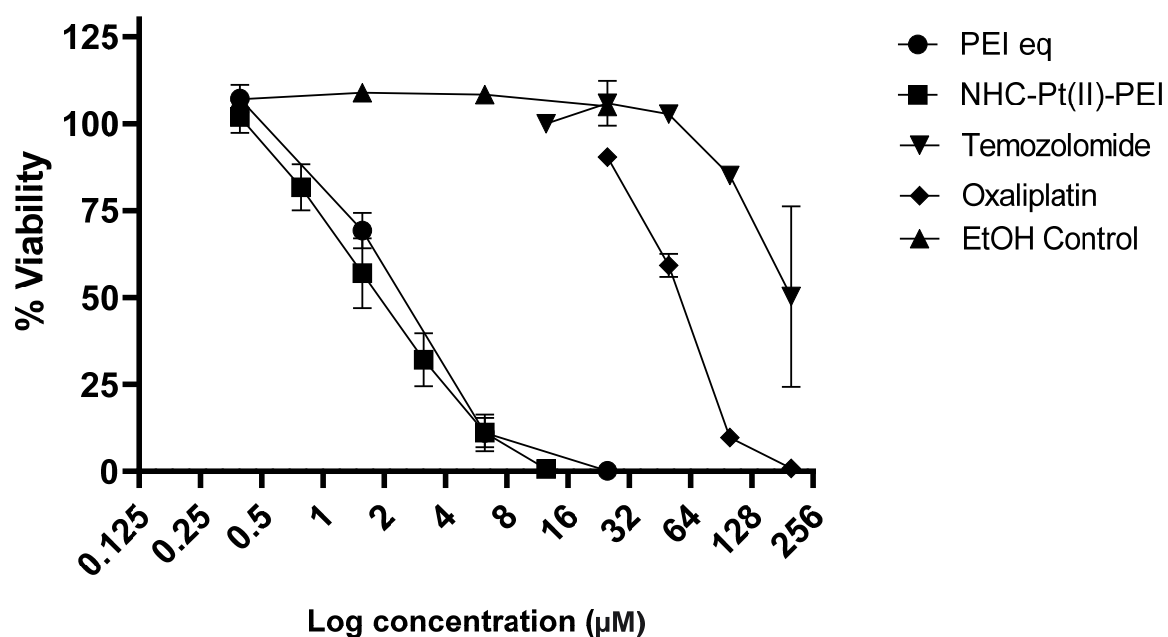

**Figure S4. IC<sub>50</sub> for the GSC cell line 3731.** CelltiterGlo 3D viability dose-response of 24 h treated 3731 cells. Values represent the mean of at least n=3 independent replicates. Error bars represent +/- one SEM

### DPSC

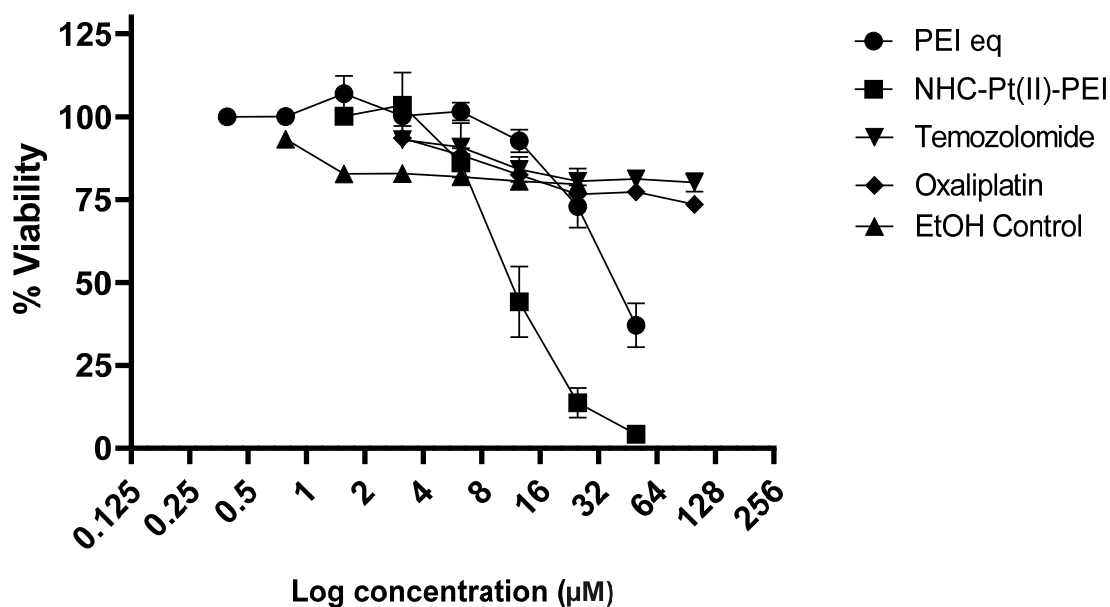

**Figure S5. IC<sub>50</sub> for the non-cancerous stem cells, DPSCs.** CelltiterGlo 3D viability dose-response of 24 h treated DPSC cells. Values represent the mean of at least n=3 independent replicates. Error bars represent +/- one SEM.

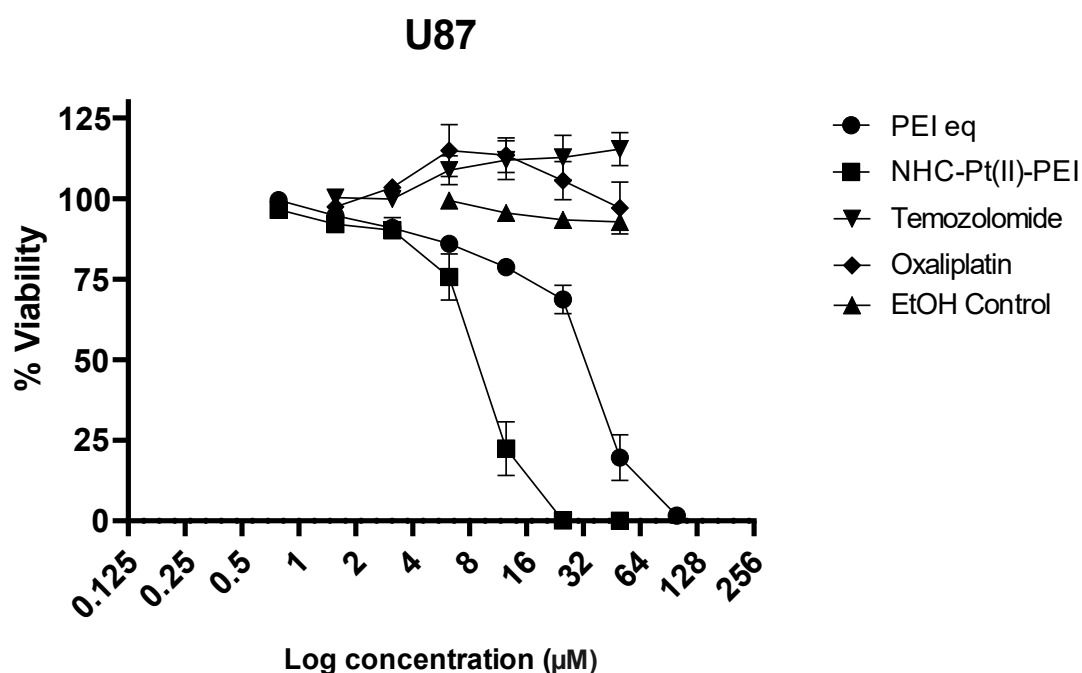

**Figure S6. IC<sub>50</sub> for the non-stem glioma cell line U87-MG.** CelltiterGlo 3D viability dose-response of 24 h treated U87 cells. Values represent the mean of at least n=3 independent replicates. Error bars represent +/- one SEM.

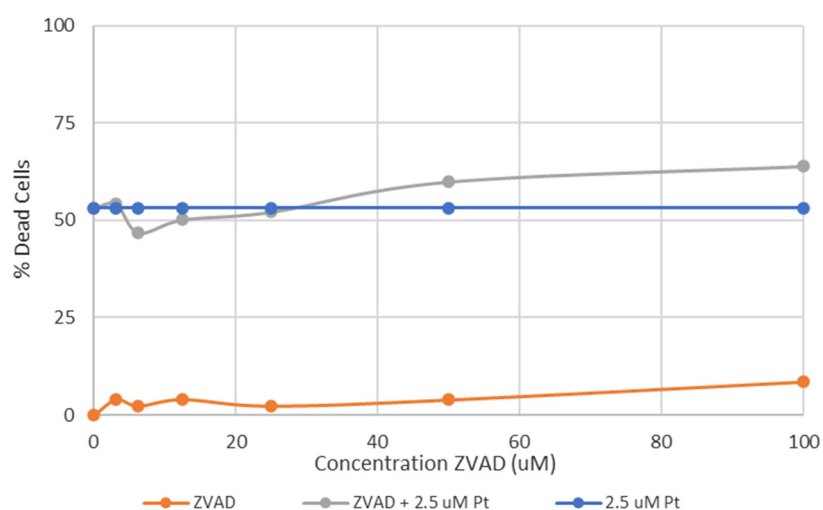

**Figure S7. Cell death proportion of 24 h NHC-Pt(II)-PEI and zVAD-fmk co-treated NCH421K cells.** The proportion of propidium iodide positive (dead) cells measured by flow cytometry following 24 h treatment with 2.5 μM NHC-Pt(II)-PEI (noted Pt), a cascade of concentrations of zVAD-fmk (noted ZCAD) or 2.5 μM NHC-Pt(II)-PEI + ZVAD.

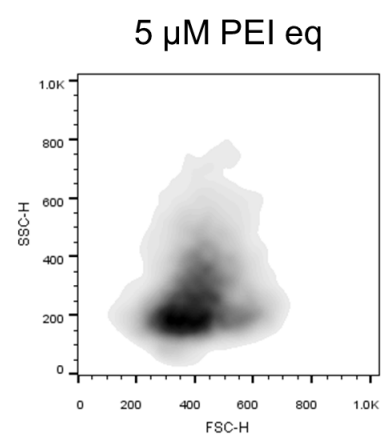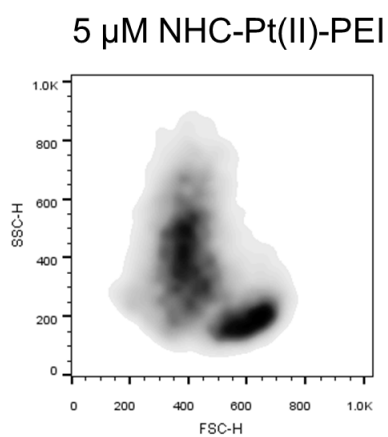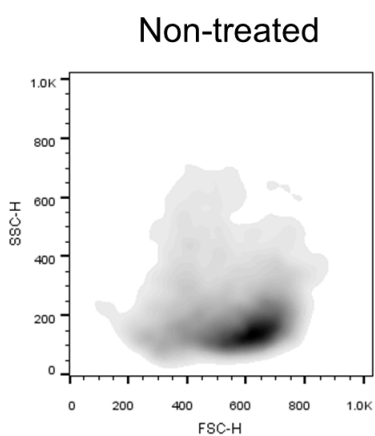

**Figure S8.** The granularity of 24 h 5  $\mu$ M PEI eq and NHC-Pt(II)-PEI treated NCH421K spheroids. Flow cytometry FSC and SSC dot plots (FlowJo) of treated cells.

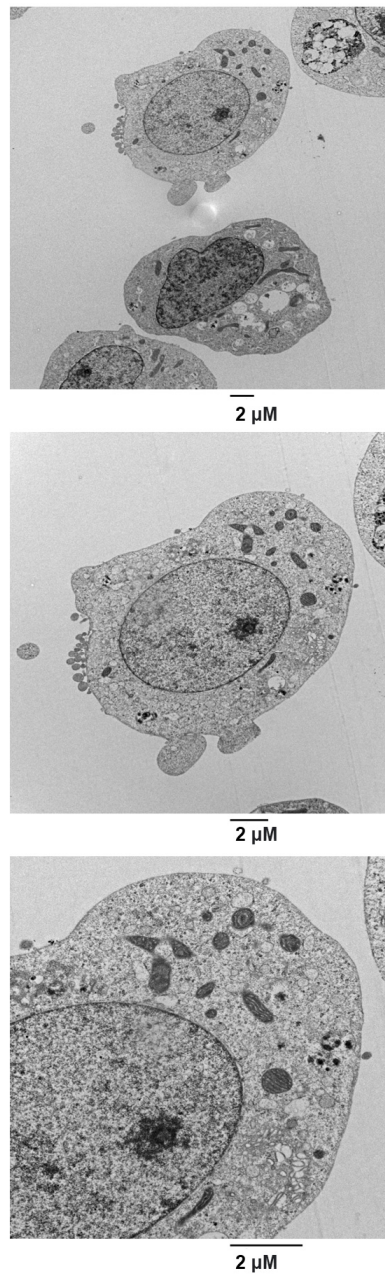

**Figure S9. Transmission electron microscopy of 6 h 60 μM chloroquine treated NCH421K cells. Top = 5000x magnification. Middle = 8000x magnification. Bottom = 15,000x magnification.**

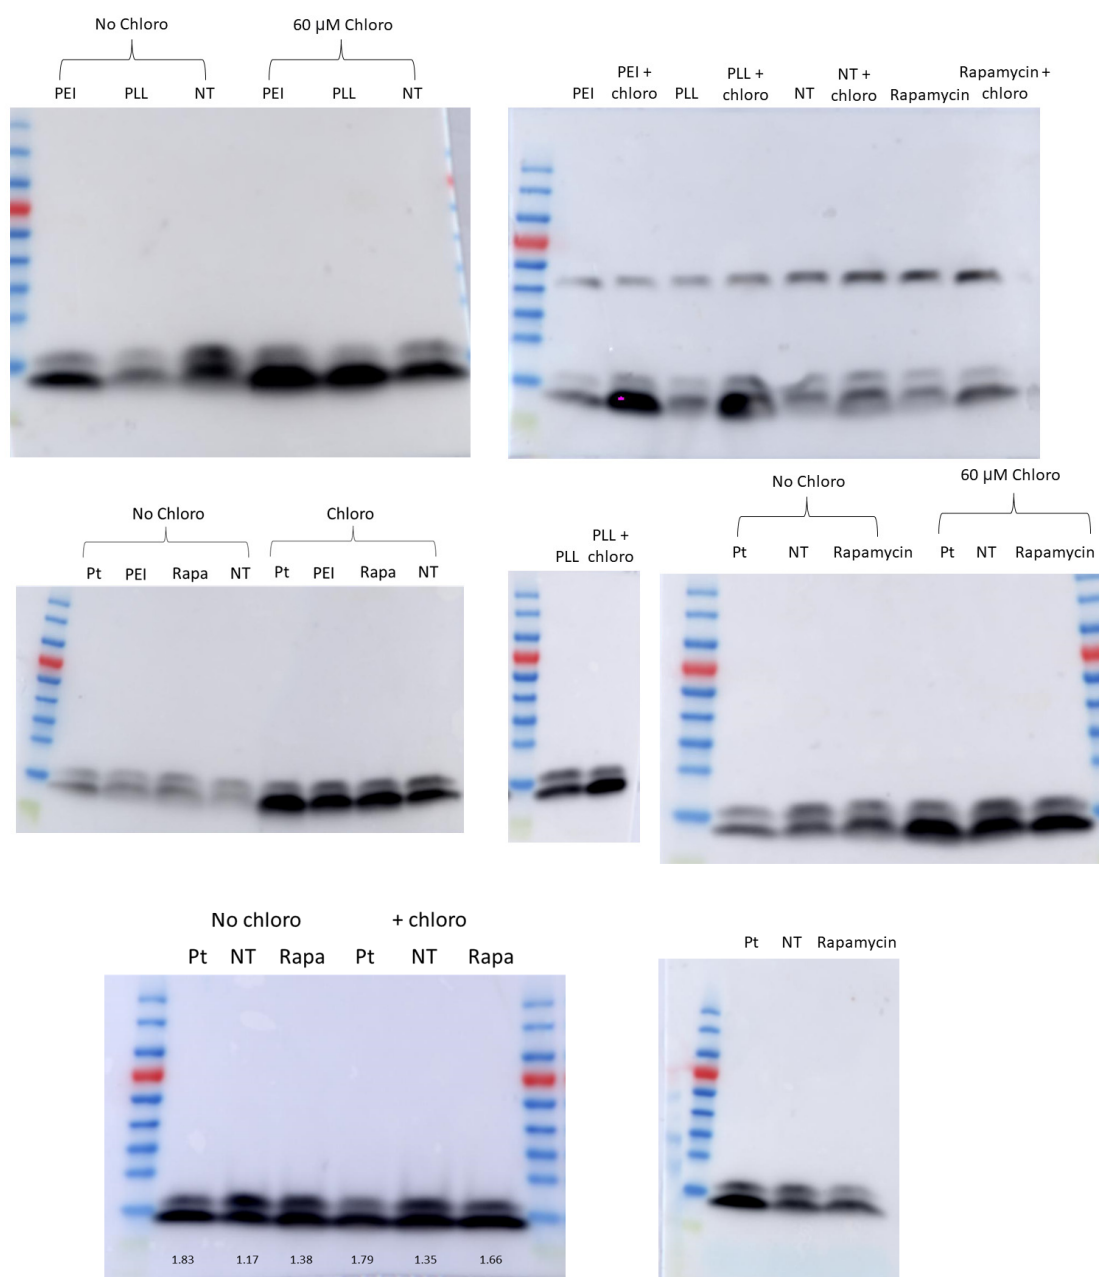

**Figure S10. Unedited LC3 western blots.** All treatments 6 h except chloroquine (3 h). Pt = NHC-Pt(II)-PEI. Rapamycin (Rapa) = 10  $\mu$ M. Poly-L-Lysine (PLL) = 5  $\mu$ M Pt eq (294 nM polymer). Polyethylenimine (PEI) = 5  $\mu$ M Pt eq (294 nM polymer). Non-treated = NT.



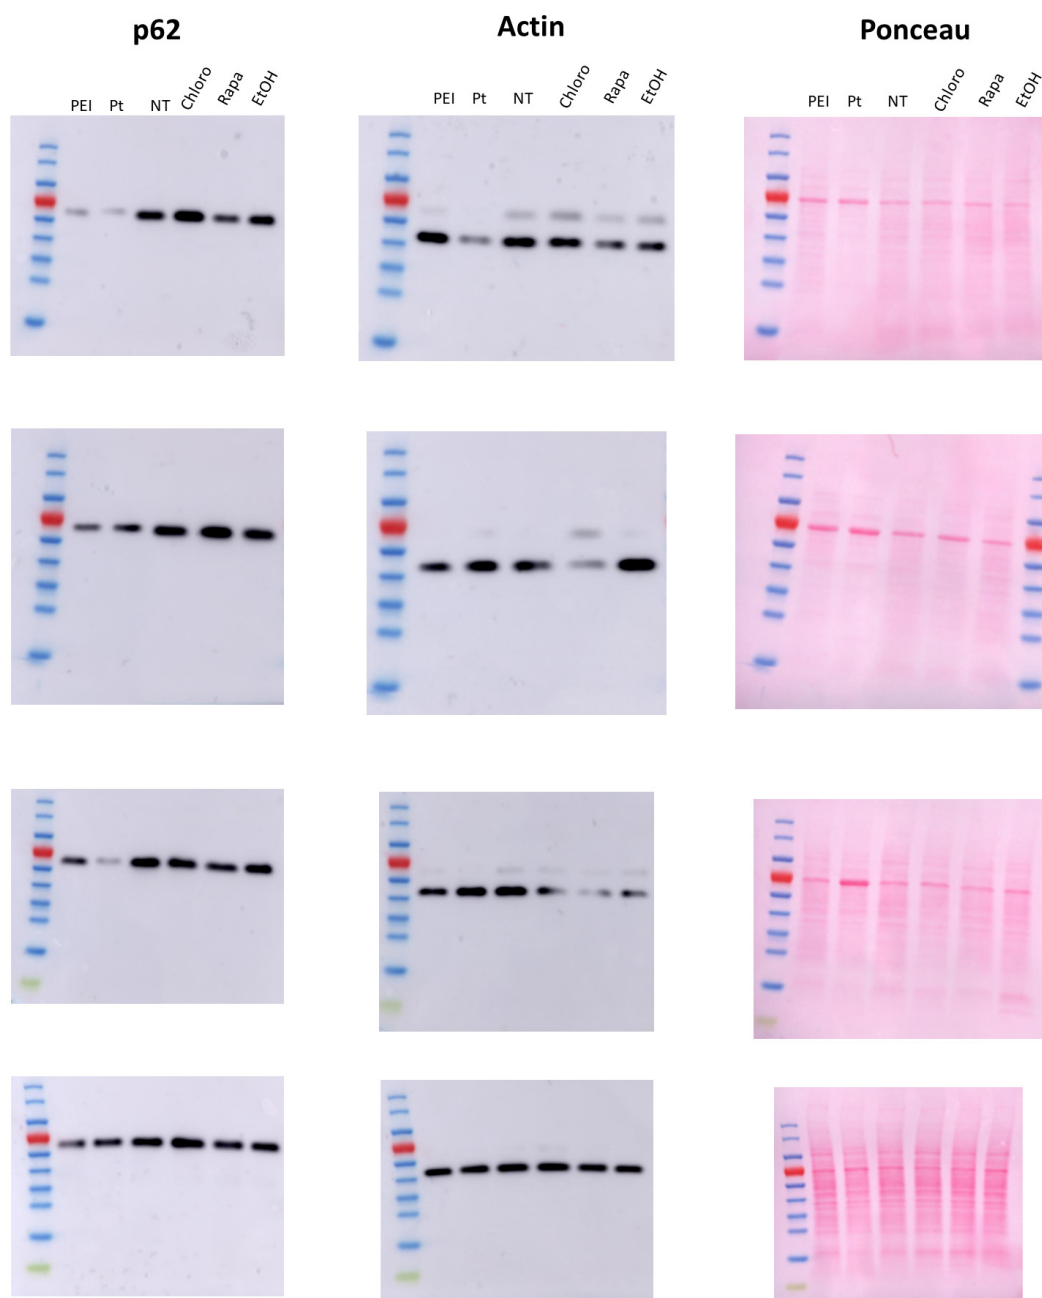

**Figure S11. Unedited p62 western blots.** Pt (NHC-Pt(II)-PEI) = 5  $\mu$ M. Polyethylenimine (PEI) = 5  $\mu$ M Pt eq (294 nM polymer). Non-treated = NT. Chloro (chloroquine) = 60  $\mu$ M. Rapamycin (Rapa) = 10  $\mu$ M. Ethanol control (EtOH) = Equivalent EtOH quantity corresponding to NHC-Pt(II)-PEI condition. All treatments 6 h.

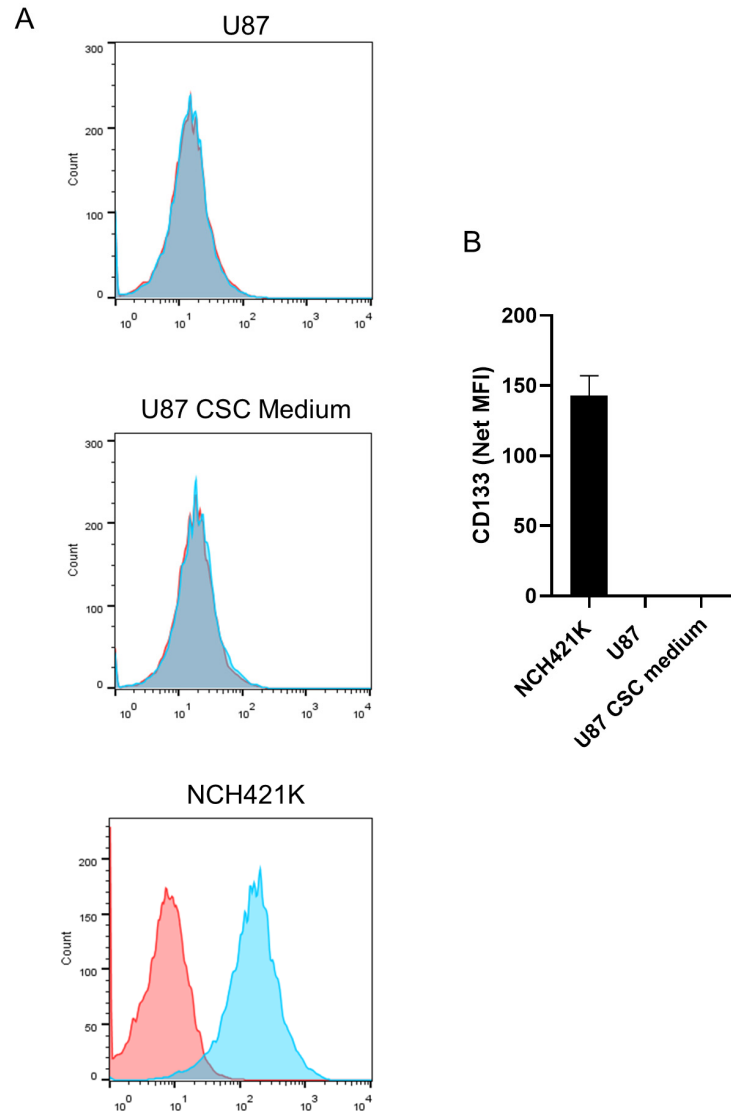

**Figure S12. U87 CD133 expression.** A) Representative flow cytometry histograms (FlowJo) of CD133 expression on U87 cells, U87 cells cultured for 24 h in CSC medium, and NCH421K cell. Red = isotype. Blue = CD133. B) Histograms of net MFI (geometric mean fluorescence intensity) (MFI CD133 – MFI isotype) CD133 expression. Values represent the mean of n=3 independent experiments  $\pm$  one SEM.
